# Supplementary material for: Platinum(ii)-bis(9-methyladenine) complexes; N1→N6 migration of Pt(ii) vs deamination of coordinated methyladenine
Source: Royal Society of Chemistry journal article supplement (doi:10.1039/b315987f), 2004-01-01
Supplement: b315987f.doc [file b315987f.doc]

Platinum(II)-bis(9-Methyladenine) Complexes; N1N6 Migration of Pt(II) *vs* Deamination of Coordinated Methyladenine

Karel D. Klika* and Jorma Arpalahti

Department of Chemistry, University of Turku, FIN–20014 Turku, Finland

## **Electronic Supplementary Information**

## **Experimental**

#### *NMR spectroscopy*

NMR spectra were acquired from samples dissolved in D2O or D2OH2O, generally at 25 ºC or at various temperatures as indicated in a field of 11.75 T using a JEOL Alpha spectrometer equipped with either a 5 mm normal configuration tuneable probe or a 5 mm inverse z-axis field-gradient probe operating at 500.16 MHz for 1H, 125.78 MHz for 13C, and 107.25 MHz for 195Pt. 1H and 13C spectra were referenced internally to TSP (0 ppm for both); 195Pt spectra were referenced externally to [PtCl4]2 (1625 ppm). For 13C (1H), the chemical shifts are reported to two (three) decimal places when taken from 1-D spectra and to one (two) decimal place(s) when they were extracted from the f1 dimension of 2-D spectra or taken from very broad resonances in the 1-D spectra.

1-D 1H spectra were acquired with single-pulse excitation, 45º flip angle, pulse recycle time of 9.5 s and with spectral widths of 7 kHz consisting of 64 k data points (digital resolution 0.11 Hz/pt), zero-filled to 128 k prior to Fourier transformation. 1-D 13C spectra were acquired with single-pulse excitation, 45º flip angle, pulse recycle time of 3.5 s and with spectral widths of 30 kHz consisting of 64 k data points (digital resolution 0.46 Hz/pt), zero-filled to 128 k and with 1 Hz exponential weighting applied prior to Fourier transformation. dept 135º spectra were acquired with similar spectral windows and processing as utilised for the 1-D carbon spectra but with a post acquisition delay time of 3 s. fg hmqc and fg hmbc experiments were both acquired in magnitude mode with spectral widths and resolution appropriately optimised from the 1-D spectra and processed with zero-filling ( 2,  4), a /(38)-shifted sinebell function, and exponential weighting (35 Hz, 525 Hz) applied in both dimensions prior to Fourier transformation. Both hmqc and hmbc spectra utilised a 1*J*H,C coupling of 220 Hz, whilst the hmbc correlations were optimised for a long-range n*J*H,C coupling of 8 Hz. 1-D 195Pt spectra were acquired with single-pulse excitation, 70º flip angle, pulse recycle time of 0.35 s and with spectral widths of 182 kHz consisting of 8 k data points (digital resolution 22 Hz/pt). FIDs were zero-filled to 32 k and treated with 250500 Hz of exponential weighting and removal of the first 0.31.3% of the FID prior to Fourier transformation.

##### Mass spectra

Low-resolution ESI+ mass spectra were acquired on a PE-Sciex triple-quadrupole LC/MS/MS instrument using direct infusion (50% aqueous methanol) as the inlet source (source temperature 300 C). Spectra were scanned from *m*/*z* 502000 amu in steps of 0.3 amu. For fragment ion analysis, the mass spectra of Q1-selected ions (product ion scans) were scanned over the range of *m*/*z* 140160 amu and also incremented in steps of 0.3 amu using Q3.

**Spectral data**

**Table 1** 1H and 13C NMR data (**/ppm) for **1****3** and various related compounds in D2O or D2OH2O or as indicated

| compound | C-2/H-2 | C-8/H-8 | CMe/HMe | C-4 | C-5 | C-6 |
| --- | --- | --- | --- | --- | --- | --- |
| *cis*-[Pt(NH3)2(9-made-N1) (9-made-N6)] (**1**)  N1, major species | 156.35 | 147.11 | 32.97 | 150.49 | 121.20 | 158.01 |
| 8.812 | 8.182 | 3.816 |  |  |  |
| *cis*-[Pt(NH3)2(9-made-N1) (9-made-N6)] (**1**)  N1, major species | 156.82 | 146.96 | 32.97 | 150.49 | 120.86 | 158.01 |
| 8.776 | 8.196 | 3.828 |  |  |  |
| *cis*-[Pt(NH3)2(9-made-N1) (9-made-N6)] (**1**)  N6, major species | 147.46 | 145.29 | 33.15 | 147.26 | 123.25 | 157.25 |
| 8.196 | 8.068 | 3.783 |  |  |  |
| *cis*-[Pt(NH3)2(9-made-N1) (9-made-N6)] (**1**)  N6, minor species | 147.64 | 145.79 | 33.15 | 150.02 | 122.05 | 154.51 |
| 7.968 | 8.273 | 3.884 |  |  |  |
| *cis*-[Pt(NH3)2(9-made-N6) (9-mhyp-N1)] (**2**)  N6 | 147.19 | 145.40 | 33.01# | 147.19 | 123.8 | 157.19 |
| 8.140 | 7.952 | 3.747* |  |  |  |
| *cis*-[Pt(NH3)2(9-made-N6) (9-mhyp-N1)] (**2**)  N1 | 145.4 | 157.71 ! | 32.86# | 145.5 | 120.6 | ? |
| 7.97 | 8.409 | 3.733* |  |  |  |
| *cis*-[Pt(NH3)2(9-made-N6)2]  (**3**) | 147.38 | 145.52 | 33.04 | 146.0 | 123.69 | 157.3 |
| 8.086 | 8.018 | 3.787 |  |  |  |
| *cis*-[Pt(NH3)2(9-made-N1)2]  major species, ref 1 | 156.31 | 147.09 | 32.82 | 150.39 | 121.2 | 157.79 |
| 8.797 | 8.153 | 3.812 |  |  |  |
| *cis*-[Pt(NH3)2(9-made-N1)2]  minor species, ref 1 | 155.28 | 147.18 | 32.86 | 150.46 | 121.0 | 157.96 |
| 8.883 | 8.158 | 3.829 |  |  |  |
| 9-made | 154.86 | 145.71 | 32.62 | 151.74 | 120.78 | 157.91 |
| 8.074 | 7.965 | 3.732 |  |  |  |
| 9-made, pH *ca.* 4 | 147.22 | 148.56 | 33.35 | 151.87 | 120.84 | 152.73 |
| 8.441 | 8.294 | 3.900 |  |  |  |
| adenine (in DMSO), ref 2 | 152.4 | 139.3 |  | 151.3 | 117.6 | 155.3 |
| nr | nr |  |  |  |  |
| hypoxanthine (in DMSO), ref 2 | 144.6 | 140.2 ? |  | 153.2 ? | 119.2 | 155.4 |
| nr | nr |  |  |  |  |
| *trans*-[Pt(NH3)2(9-made-N6) (9-made-N7)]  N6, major species, ref 3 | nr | nr | nr | nr | nr | nr |
| 8.220 | 8.055 | 3.861 |  |  |  |
| *trans*-[Pt(NH3)2(9-made-N6) (9-made-N7)]  N6, minor species, ref 3 | nr | nr | nr | nr | nr | nr |
| 8.315 | 8.302 | 3.878 |  |  |  |
| *trans*-[Pt(NH3)2(9-made-N6) (9-made-N7)]  N7, major species, ref 3 | nr | nr | nr | nr | nr | nr |
| 8.593 | 8.999 | 4.023 |  |  |  |
| *trans*-[Pt(NH3)2(9-made-N6) (9-made-N7)]  N7, minor species, ref 3 | nr | nr | nr | nr | nr | nr |
| 8.611 | 9.041 | 4.050 |  |  |  |
| *cis*-[Pt(NH3)2(9-made-N7)2]  major species, ref 1 | 156.41 | 147.03 | 33.56 | 151.75 | 118.23 | 156.45 |
| 8.292 | 8.628 | 3.799 |  |  |  |
| *cis*-[Pt(NH3)2(9-made-N7)2]  minor species, ref 1 | no | no | no | no | no | no |
| 8.240 | 8.764 | no |  |  |  |
| *cis*-[Pt(NH3)2(9-made-N1) (9-made-N7)]  N1, major species, ref 1 | 155.59 | 147.30 | 32.63 | 150.36 | 121.42 | 157.90 |
| 8.639 | 8.070 | 3.702 |  |  |  |
| *cis*-[Pt(NH3)2(9-made-N1) (9-made-N7)]  N1, minor species, ref 1 | 155.25 | no | no | no | 121.31 | 157.84 |
| 8.826 | 8.040 | 3.759 |  |  |  |
| *cis*-[Pt(NH3)2(9-made-N1) (9-made-N7)]  N7, major species, ref 1 | 156.33 | 147.16 | 33.57 | 151.71 | 118.20 | 156.37 |
| 8.260 | 8.695 | 3.819 |  |  |  |
| *cis*-[Pt(NH3)2(9-made-N1) (9-made-N7)]  N7, minor species, ref 1 | no | 146.81 | no | no | 118.34 | ? |
| 8.224 | 8.844 | 3.836 |  |  |  |

| *cis*-[Pt(NH3)2(9-made-N6) (9-made-N7)]1+  N6, major species, ref 4 | 155.84 | 143.10 | 32.54 | 148.89 | 123.33 | 165.01 |
| --- | --- | --- | --- | --- | --- | --- |
| 8.013 | 7.685 | 3.635 |  |  |  |
| *cis*-[Pt(NH3)2(9-made-N6) (9-made-N7)]1+  N6, minor species, ref 4 | no | no | no | no | no | no |
| 7.744 | 7.999 | 3.750 |  |  |  |
| *cis*-[Pt(NH3)2(9-made-N6) (9-made-N7)]1+  N7, major species, ref 4 | 156.07 | no | 33.58 | 151.41 | 118.67 | 157.01 |
| 8.251 | 8.671 | 3.884 |  |  |  |
| *cis*-[Pt(NH3)2(9-made-N6) (9-made-N7)]1+  N7, minor species, ref 4 | no | no | no | no | no | no |
| 8.210 | 8.557 | 3.823 |  |  |  |
| *cis*-[Pt(NH3)2(9-made-N6) (9-made-N7)]2+  N6, major species, ref 4 | 147.83 | 145.40 | 33.05 | 150.12 ? | 123.85 | ? |
| 8.172 | 7.995 | 3.780 |  |  |  |
| *cis*-[Pt(NH3)2(9-made-N6) (9-made-N7)]2+  N6, minor species, ref 4 | 147.61 | 145.65 | 33.13 ? | ? | ? | ? |
| 7.995 | 8.224 | 3.873 |  |  |  |
| *cis*-[Pt(NH3)2(9-made-N6) (9-made-N7)]2+  N7, major species, ref 4 | 156.31 | 147.32 | 33.76 | 151.72 | 118.76 | 156.93 ? |
| 8.328 | 8.702 | 3.897 |  |  |  |
| *cis*-[Pt(NH3)2(9-made-N6) (9-made-N7)]2+  N7, minor species, ref 4 | 156.31 ? | 147.32 | 33.66 ? | no | no | no |
| 8.309 | 8.576 | 3.873 |  |  |  |
| *cis*-[Pt(NH3)2(9-made-N6) (9-mhyp-N7)]  N6, ref 4 | nr | nr | nr | nr | nr | nr |
| 8.111 | 7.994 | 3.785 |  |  |  |
| *cis*-[Pt(NH3)2(9-made-N6) (9-mhyp-N7)]  N7, ref 4 | nr | nr | nr | nr | nr | nr |
| 8.318 | 8.570 | 3.872 |  |  |  |
| [Pt(dien)(9-mhyp-N7)] | nr | nr | nr | nr | nr | nr |
| 8.30 | 8.55 | 3.89 |  |  |  |
| [Pt(dien)(9-made-N6)]  major species | 147.5 | 145.4 | 33.12 | 147.5 | 124.1 | 157.9 |
| 8.135 | 8.002 | 3.797 |  |  |  |
| [Pt(dien)(9-made-N6)]  minor species | 147.6 | 145.5 | 33.12 | 150.2 ? | 121.8 |  |
| 7.965 | 8.096 | 3.816 |  |  |  |

Notes: made, 9-methyladenine; mhyp, 9-methylhypoxanthine; dien, diethylenetriamine; no, not observed; nr, not recorded; ?, questionable; any signal bearing a superscripted sign may be interchanged with another signal bearing the same superscript; ? indicates not observed or buried under other signals; when one (two) decimal place(s) is reported for a signal when the other signals of the set are reported to two (three) decimal places it indicates that the signal is either very broad or the chemical shift was measured indirectly.

**References**

2 H. O. Kalinowski, S. Berger and S. Braun, in *Carbon-13 NMR Spectroscopy*, Wiley, Chichester, 1988.

1 J. Arpalahti, K. D. Klika and S. Molander, *Eur. J. Inorg. Chem*. 2000, 1007–1013.

3 J. Viljanen, K. D. Klika, R. Sillanpää and J. Arpalahti, *Inorg. Chem*. 1999, **38**, 4924–4925.

4 J. Arpalahti and K. D. Klika, *Eur. J. Inorg. Chem*. 2003, 41954201.
